# Supplementary material for: Validation of a novel claims-based stroke severity index in patients with intracerebral hemorrhage
Source: PubMed Central journal article supplement — J Epidemiol. 2016 Oct 18;27(1):24–9. doi: 10.1016/j.je.2016.08.003 (PMC5328736; doi:10.1016/j.je.2016.08.003), 2016-10-18

**eTable 1.** ICD-9-CM diagnosis codes used to identify comorbidities

| Condition                          | ICD-9-CM codes                                                                                                             |
|------------------------------------|----------------------------------------------------------------------------------------------------------------------------|
| Hypertension                       | 401, 402, 405                                                                                                              |
| Hyperlipidemia                     | 272.0, 272.1, 272.2, 272.3, 272.4                                                                                          |
| Stroke                             | 430, 431, 432, 433, 434, 436, 438                                                                                          |
| Atrial fibrillation                | 427.31                                                                                                                     |
| Myocardial infarct                 | 410.11, 410.71, 410.72, 410.81, 410.91, 411.1, 411.81, 412, 413.1, 413.9, 429.79                                           |
| Congestive heart failure           | 402.01, 402.11, 402.91, 428.0, 428.1, 429.3                                                                                |
| Peripheral vascular disease        | 440.20, 440.21, 440.23, 440.24, 440.9, 443.81, 443.9, 444.22                                                               |
| Dementia                           | 290.0, 290.10, 290.12, 290.40, 291.0, 291.2, 291.8, 291.81, 293.0, 293.83, 294.0, 294.1, 294.8, 438                        |
| Chronic pulmonary disease          | 416.0, 416.8, 416.9, 491.20, 491.21, 491.8, 491.9, 492.0, 492.8, 493.20, 403.90, 495.1 496, 508.0, 515, 516.3, 518.1       |
| Connective tissue disease          | 710.0, 710.1, 710.4, 712.38, 714.0, 715.09, 715.36, 715.89, 715.91, 715.95, 715.96, 715.98, 716.98, 716.99, 719.98, 728.89 |
| Ulcer disease                      | 531.40, 532.40, 532.70, 532.90, 533.20, 533.70, 533.90                                                                     |
| Mild liver disease                 | 571.2, 571.3, 571.5, 573.8                                                                                                 |
| Diabetes                           | 250.00, 250.01, 250.02, 250.03, 250.20, 250.21, 250.80, 250.81, 250.82, 250.83                                             |
| Diabetes with end-organ damage     | 250.31, 250.40, 250.41, 250.50, 250.51, 250.52, 250.60, 250.61, 250.62, 250.63, 250.71, 250.72, 250.90, 250.92             |
| Moderate or severe renal disease   | 581.9, 582.81, 582.9, 583.81, 585, 586                                                                                     |
| Nonmetastatic solid tumor          | 153.9, 154.8, 162.3, 162.4, 162.9, 173.9, 185, 200.13, 238.4                                                               |
| Leukemia                           | 204.10, 204.11, 205.00                                                                                                     |
| Lymphoma, multiple myeloma         | 202.80                                                                                                                     |
| Metastatic tumor                   | 197.0, 197.4, 197.7, 198.3, 198.5, 198.89, 199.0 199.1                                                                     |
| Acquired immunodeficiency syndrome | 042                                                                                                                        |

ICD-9-CM, International Classification of Diseases, Ninth Revision, Clinical Modification.

**eTable 2.** Predictors of stroke severity index and their corresponding billing codes in Taiwan's National Health Insurance program

| Predictor                                   | Billing codes                                                                                                                                                                                                                                                                                                                                                                                                                                                                                                                                                                                                                                  |
|---------------------------------------------|------------------------------------------------------------------------------------------------------------------------------------------------------------------------------------------------------------------------------------------------------------------------------------------------------------------------------------------------------------------------------------------------------------------------------------------------------------------------------------------------------------------------------------------------------------------------------------------------------------------------------------------------|
| Airway suctioning                           | 47041C, 47042C                                                                                                                                                                                                                                                                                                                                                                                                                                                                                                                                                                                                                                 |
| Bacterial sensitivity test                  | 13009B, 13009BB, 13010B, 13010BA, 13011B, 13011BB, 13020B                                                                                                                                                                                                                                                                                                                                                                                                                                                                                                                                                                                      |
| General ward stay                           | 02006K, 02007A, 02008B, 03001K, 03002A, 03003B, 03004B, 03005K, 03006A, 03007B, 03008B, 03026K, 03027A, 03028B, 03029B                                                                                                                                                                                                                                                                                                                                                                                                                                                                                                                         |
| ICU stay                                    | 02011K, 02012A, 02013B, 03010E, 03010K, 03011A, 03011F, 03012B, 03012G, 03013B, 03013H, 03047E, 03048F, 03049G, 03050H                                                                                                                                                                                                                                                                                                                                                                                                                                                                                                                         |
| Nasogastric intubation                      | 47017C, 47018C, 47018CA                                                                                                                                                                                                                                                                                                                                                                                                                                                                                                                                                                                                                        |
| Osmotherapy (mannitol or glycerol infusion) | A009633255, A009633266, A009633277, A009745277, A013354277, A015561255, A015561266, A015561277, A016476238, A016476266, A016476277, A031387238, A033425266, A042601238, B014379277, B020322265, B020322277, N012343266, A023733263, A023733265, A023733266, A023733277, A024986209, A024986265, A024986266, A024986277, A025104266, A025104277, A025355266, A025355277, A026793265, A026793266, A026793277, A028475265, A028475277, A029475265, A029475266, A029475277, A034722277, AC23733263, AC23733266, AC23733277, AC24986265, AC24986266, AC24986277, AC28475277, AC29475265, B006604277, B017082263, B017082277, B017728265, B017728277 |
| Urinary catheterization                     | 47013C, 47014C                                                                                                                                                                                                                                                                                                                                                                                                                                                                                                                                                                                                                                 |

ICU, intensive care unit.

**eTable 3.** Characteristics of patients across the study hospitals

| Characteristic                     | CMMC<br>(n=955) | LH<br>(n=239) | CYCH<br>(n=166) | <i>P</i>            |
|------------------------------------|-----------------|---------------|-----------------|---------------------|
| Mean (SD) age, years               | 60.5 (14.4)     | 62.1 (15.7)   | 61.8 (14.5)     | 0.236 <sup>a</sup>  |
| Female sex                         | 360 (37.7)      | 69 (28.9)     | 58 (34.9)       | 0.038 <sup>b</sup>  |
| Mean (SD) NIHSS score              | 17.3 (12.9)     | 19.2 (13.0)   | 12.1 (11.1)     | <0.001 <sup>a</sup> |
| Mean (SD) SSI score                | 15.4 (7.0)      | 13.5 (6.3)    | 14.2 (5.9)      | <0.001 <sup>a</sup> |
| Airway suctioning                  | 309 (32.4)      | 46 (19.2)     | 54 (32.5)       | <0.001 <sup>b</sup> |
| Bacterial sensitivity test         | 365 (38.2)      | 40 (16.7)     | 25 (15.1)       | <0.001 <sup>b</sup> |
| General ward stay                  | 767 (80.3)      | 172 (72.0)    | 144 (86.7)      | 0.001 <sup>b</sup>  |
| ICU stay                           | 700 (73.3)      | 182 (76.2)    | 149 (89.8)      | <0.001 <sup>b</sup> |
| Nasogastric intubation             | 572 (59.9)      | 126 (52.7)    | 84 (50.6)       | 0.021 <sup>b</sup>  |
| Osmotherapy (mannitol or glycerol) | 732 (76.6)      | 76 (31.8)     | 84 (50.6)       | <0.001 <sup>b</sup> |
| Urinary catheterization            | 615 (64.4)      | 92 (38.5)     | 85 (51.2)       | <0.001 <sup>b</sup> |

CMMC, Chi Mei Medical Center; CYCH, Chiayi Christian Hospital; ICU, intensive care unit; LH, Landseed Hospital;

NIHSS, National Institutes of Health Stroke Scale; SD, standard deviation; SSI, stroke severity index.

<sup>a</sup>Analysis of variance

<sup>b</sup>Chi-squared test

Data are presented as numbers (percentage) unless otherwise specified.

**eTable 4.** Logistic regression models to predict 3-month mortality

|                       | Base model                    | Model with NIHSS              | Model with SSI                |
|-----------------------|-------------------------------|-------------------------------|-------------------------------|
|                       | OR (95% CI)                   |                               |                               |
| Age                   | 1.01 (1.00-1.02)              | 1.01 (1.00-1.03) <sup>a</sup> | 1.01 (1.00-1.02)              |
| Female                | 0.99 (0.71-1.38)              | 0.90 (0.60-1.35)              | 0.98 (0.68-1.40)              |
| Modified CCI $\geq 2$ | 1.59 (1.10-2.30) <sup>a</sup> | 1.44 (0.91-2.26)              | 1.54 (1.02-2.32) <sup>a</sup> |
| Hypertension          | 0.33 (0.23-0.46) <sup>c</sup> | 0.30 (0.20-0.46) <sup>c</sup> | 0.36 (0.25-0.52) <sup>c</sup> |
| Hyperlipidemia        | 0.39 (0.22-0.69) <sup>b</sup> | 0.64 (0.32-1.27)              | 0.60 (0.32-1.13)              |
| Prior stroke          | 1.46 (0.94-2.27)              | 1.25 (0.73-2.14)              | 1.29 (0.80-2.08)              |
| Atrial fibrillation   | 0.94 (0.25-3.53)              | 1.66 (0.37-7.44)              | 0.79 (0.19-3.28)              |
| NIHSS                 | NA                            | 1.16 (1.14-1.19) <sup>c</sup> | NA                            |
| SSI                   | NA                            | NA                            | 1.25 (1.20-1.31) <sup>c</sup> |

CCI, Charlson comorbidity index; CI, confidence interval; NA, not applicable; NIHSS, National Institutes of Health

Stroke Scale; OR, odds ratio; SSI, stroke severity index.

<sup>a</sup> $P < 0.05$

<sup>b</sup> $P < 0.01$

<sup>c</sup> $P < 0.001$

**eTable 5.** Logistic regression models to predict 6-month mortality

|                       | Base model                    | Model with NIHSS              | Model with SSI                |
|-----------------------|-------------------------------|-------------------------------|-------------------------------|
|                       | OR (95% CI)                   |                               |                               |
| Age                   | 1.01 (1.00-1.02) <sup>a</sup> | 1.02 (1.01-1.03) <sup>b</sup> | 1.01 (1.00-1.03) <sup>a</sup> |
| Female                | 0.97 (0.70-1.33)              | 0.83 (0.56-1.22)              | 0.92 (0.65-1.31)              |
| Modified CCI $\geq 2$ | 1.56 (1.09-2.23) <sup>a</sup> | 1.39 (0.90-2.16)              | 1.47 (0.99-2.18)              |
| Hypertension          | 0.34 (0.25-0.48) <sup>c</sup> | 0.32 (0.21-0.48) <sup>c</sup> | 0.37 (0.26-0.54) <sup>c</sup> |
| Hyperlipidemia        | 0.41 (0.24-0.69) <sup>b</sup> | 0.69 (0.36-1.33)              | 0.65 (0.36-1.20)              |
| Prior stroke          | 1.42 (0.93-2.17)              | 1.20 (0.72-2.00)              | 1.22 (0.77-1.94)              |
| Atrial fibrillation   | 0.77 (0.21-2.89)              | 1.19 (0.27-5.16)              | 0.62 (0.15-2.55)              |
| NIHSS                 | NA                            | 1.15 (1.13-1.17) <sup>c</sup> | NA                            |
| SSI                   | NA                            | NA                            | 1.23 (1.18-1.28) <sup>c</sup> |

CCI, Charlson comorbidity index; CI, confidence interval; NA, not applicable; NIHSS, National Institutes of Health

Stroke Scale; OR, odds ratio; SSI, stroke severity index.

<sup>a</sup> $P < 0.05$

<sup>b</sup> $P < 0.01$

<sup>c</sup> $P < 0.001$

**eTable 6.** Logistic regression models to predict 1-year mortality

|                       | Base model                    | Model with NIHSS              | Model with SSI                |
|-----------------------|-------------------------------|-------------------------------|-------------------------------|
|                       | OR (95% CI)                   |                               |                               |
| Age                   | 1.02 (1.00-1.03) <sup>b</sup> | 1.03 (1.01-1.04) <sup>c</sup> | 1.02 (1.01-1.04) <sup>b</sup> |
| Female                | 1.00 (0.71-1.40)              | 0.79 (0.52-1.21)              | 0.86 (0.59-1.28)              |
| Modified CCI $\geq 2$ | 1.76 (1.19-2.59) <sup>b</sup> | 1.50 (0.93-2.42)              | 1.57 (1.02-2.43) <sup>a</sup> |
| Hypertension          | 0.31 (0.21-0.44) <sup>c</sup> | 0.30 (0.19-0.48) <sup>c</sup> | 0.34 (0.22-0.51) <sup>c</sup> |
| Hyperlipidemia        | 0.34 (0.20-0.58) <sup>c</sup> | 0.53 (0.28-1.00)              | 0.55 (0.30-1.01)              |
| Prior stroke          | 1.31 (0.85-2.03)              | 1.21 (0.70-2.06)              | 1.24 (0.75-2.03)              |
| Atrial fibrillation   | 1.00 (0.27-3.63)              | 1.82 (0.37-8.85)              | 0.87 (0.20-3.85)              |
| NIHSS                 | NA                            | 1.14 (1.12-1.16) <sup>c</sup> | NA                            |
| SSI                   | NA                            | NA                            | 1.23 (1.18-1.28) <sup>c</sup> |

CCI, Charlson comorbidity index; CI, confidence interval; NA, not applicable; NIHSS, National Institutes of Health

Stroke Scale; OR, odds ratio; SSI, stroke severity index.

<sup>a</sup> $P < 0.05$

<sup>b</sup> $P < 0.01$

<sup>c</sup> $P < 0.001$

**eFigure 1.** Correlation of stroke severity index and mRS at 3 months, 6 months, and 1 year in the three hospitals. CMMC, Chi Mei Medical Center; CYCH, Chiayi Christian Hospital; LH, Landseed Hospital; mRS, modified Rankin Scale; NIHSS, National Institutes of Health Stroke Scales.

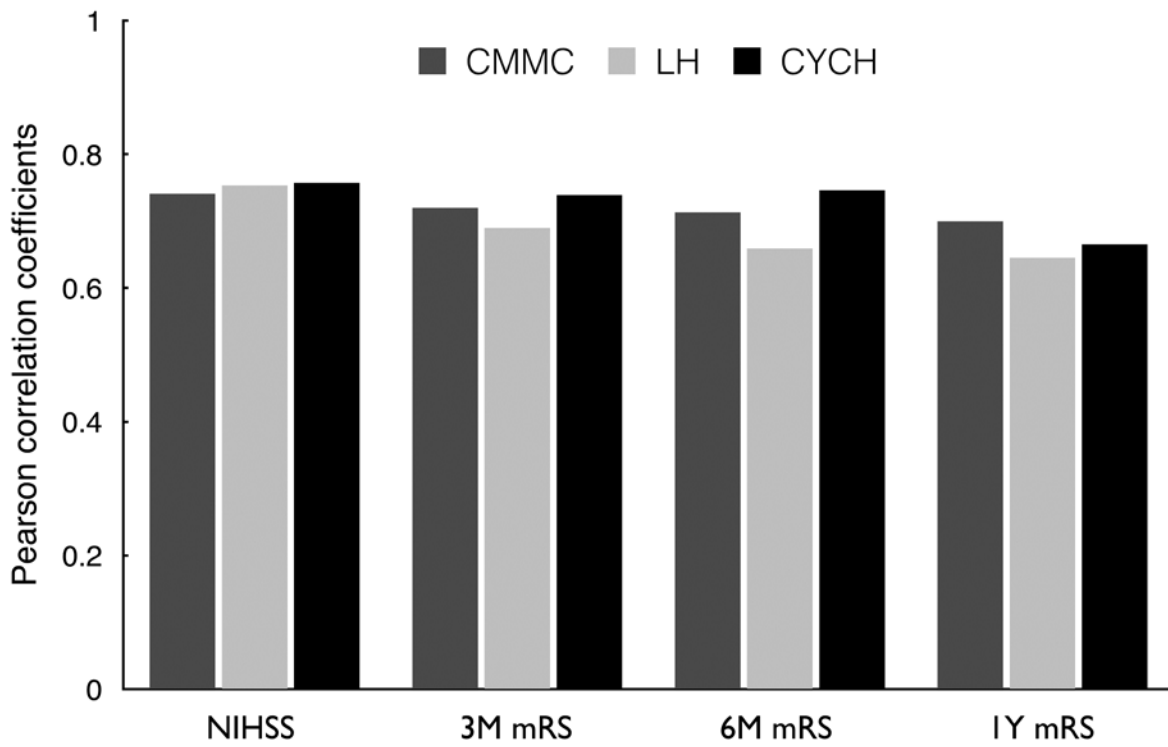

Supplement: je-27-024-s001.pdf [file je-27-024-s001.pdf]
